# Supplementary material for: Transforming NiCo2O4 nanorods into nanoparticles using citrus lemon juice enhancing electrochemical properties for asymmetric supercapacitor and water oxidation
Source: Royal Society of Chemistry journal article supplement (doi:10.1039/d3ra02438e), 2023-01-01
Supplement: d3ra02438e1.pdf [file d3ra02438e1.pdf]

## Supporting Information

### Transforming NiCo<sub>2</sub>O<sub>4</sub> nanorods into nanoparticles using citrus lemon juice enhancing electrochemical properties for asymmetric supercapacitor and water oxidation

Shusheel Kumar<sup>a</sup>, Aneela Tahira<sup>c</sup>, Adeel Liaquat Bhatti<sup>a</sup>, Muhammad Ali Bhatti<sup>d</sup>, Riaz Hussain Mari<sup>a</sup>, Nek Muhammad Shaikh<sup>a</sup>, Muhammad Yameen Solangi<sup>e</sup>, Ayman Nafady<sup>j</sup>, Mélanie Emof<sup>f</sup>, Brigitte Vigolo<sup>f</sup>, Antonia Infantes-Molina<sup>g</sup>, Alberto Vomiero<sup>\*h,i</sup>, Zafar Hussain Ibupoto<sup>\*b</sup>

<sup>a</sup>Institute of Physics, University of Sindh Jamshoro, 76080, Sindh Pakistan

<sup>b</sup>Institute of Chemistry, University of Sindh Jamshoro, 76080, Sindh Pakistan

<sup>c</sup>Institute of Chemistry, Shah Abdul Latif University Khairpur Mirs, Sindh, Pakistan

<sup>d</sup>Institute of Environmental Sciences, University of Sindh Jamshoro, 76080, Sindh Pakistan

<sup>e</sup>Mehran University of Engineering and Technology, 7680 Jamshoro, Sindh Pakistan

<sup>f</sup>Université de Lorraine, CNRS, IJL, F-54000 Nancy, France

<sup>g</sup>Department of Inorganic Chemistry, Crystallography and Mineralogy. (Unidad Asociada al ICP-CSIC), Faculty of Sciences, University of Malaga, Campus de Teatinos, 29071, Malaga, Spain

<sup>h</sup>Department of Engineering Sciences and Mathematics, Division of Material Science, Luleå University of Technology, Luleå, Sweden

<sup>i</sup>Department of Molecular Sciences and Nanosystems, Ca' Foscari University of Venice, Venezia Mestre, Italy

<sup>j</sup>Chemistry Department, College of Science, King Saud University, Riyadh, 11451, Saudi Arabia

**\*Corresponding authors:** Alberto Vomiero and Zafar Hussain Ibupoto

**Email:** [alberto.vomiero@unive.it](mailto:alberto.vomiero@unive.it), [zaffar.ibhupoto@usindh.edu.pk](mailto:zaffar.ibhupoto@usindh.edu.pk)

**Calculation (S2):** Calculation of supercapacitor of 1D NiCo<sub>2</sub>O<sub>4</sub> nanorods and its 0D nanoparticles

The calculations of Specific Capacitance  $C_s$  and energy density was done according to the published work [1] using the following mathematical relations:

$$C_s = \frac{I \times \Delta t}{m \times \Delta V}$$

Specific capacitance is  $C_s$ ,  $I$  as current,  $\Delta t$  discharge time,  $\Delta V$  potential range,  $m$  mass of deposited material onto GCE

Whereas energy density was calculated as:

$$E_d = \frac{C_s \times (\Delta V^2)}{2}$$

$E_d$  as energy density, specific capacitance as  $C_s$ ,  $\Delta V^2$  change in potential

Power density was measured as follows [1]:

$$P_d = \frac{E}{\Delta t}$$

$P_d$  represents the power density;  $E$  is the energy and  $\Delta t$  discharge time.

Asymmetric supercapacitor was fabricated using two electrodes set up involving positive electrode  $\text{NiCo}_2\text{O}_4$  nanostructures prepared with 2 mL of lemon juice and negative electrode of activated carbon (AC) in 3.0M KOH electrolytic solution. Commercial activated carbon was used for the development of negative electrode during two electrode configuration for the asymmetric device system. The slurry of activated carbon was prepared by dispersing 17 mg of AC into 3:1 volume of ethanol and the deionized water. In this mixture 100 $\mu\text{L}$  of 5% Nafion was also added. The well dispersed slurry was achieved by sonication for 10 min. The anode of  $\text{NiCo}_2\text{O}_4$  and cathode of AC was developed onto GCE respectively. The asymmetric supercapacitor was described by following configuration of  $\text{NiCo}_2\text{O}_4$  sample 2//AC ASC. The balancing of voltammetric charges for the prepared  $\text{NiCo}_2\text{O}_4$  sample 2 and AC was done with calculation of masses of two electrode by following relationship as previously reported  $Q^+ = Q^-$  equation [2].

$$m^+ m^- = C_{s-} \Delta V^- C_{s+} \Delta V^+$$

Here:  $m^\pm$ ,  $C_{s^\pm}$ , and  $\Delta V^\pm$  describes the mass, specific capacitance  $C_s$ , and potential range of  $\text{NiCo}_2\text{O}_4$  sample 2 ( + ) and AC ( - ) electrodes, respectively. The estimated total mass of  $m^+/m^-$  was about 0.17 mg in  $\text{NiCo}_2\text{O}_4$  sample 2//AC ASC. For the calculation of  $C_s$ , and energy density and power density the total mass was calculated as per the reported work [3].

$$C_s = \frac{4 \times I \times \Delta t}{m \times \Delta V}$$

$C_s$  represents specific capacitance,  $I$  current, discharge time  $\Delta t$ , potential change  $\Delta V$ , loaded mass as  $m$ .

Energy density was calculated as:

$$E_d = \frac{C_s \times (\Delta V^2)}{7.2}$$

$E_d$  is energy,  $C_s$  as specific capacitance, potential variation  $\Delta V^2$

The power density was determined by [2]:

$$P_d = \frac{C_s \times 3600}{\Delta t}$$

Here  $P_d$  is the power density,  $C_s$  is the specific capacitance and the discharge time is  $\Delta t$

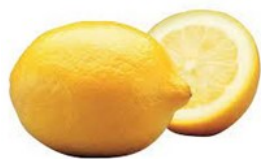

The scientific details of citrus lemons as tracheophyta (phylum), magnoliopsida (class), sapindales (order), rutaceae (family), and citrus limon/ limonum (species)

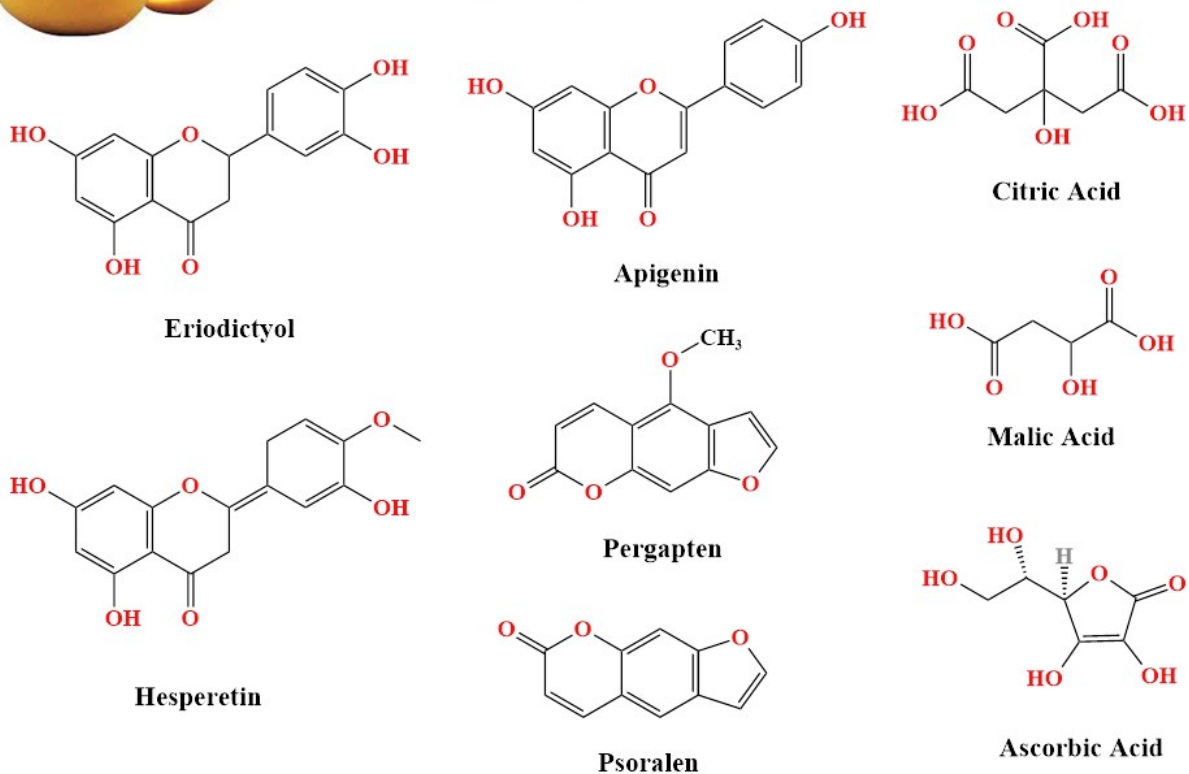

Scheme (S1): Chemical compounds in the lemon juice.

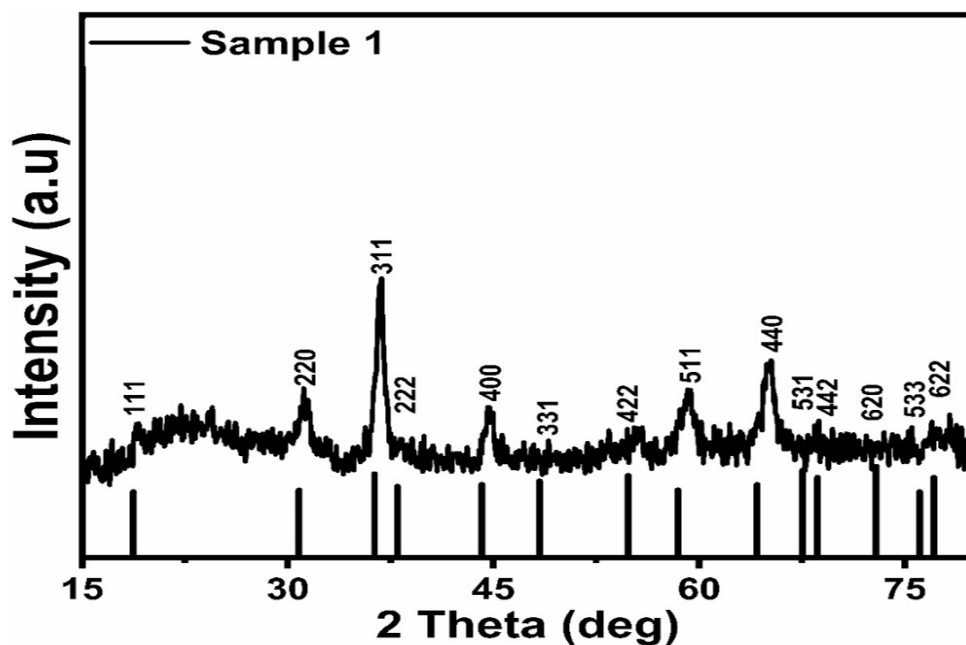

Figure S1: XRD diffraction patterns of sample 1 prepared with 0.5 mL of citrus lemon juice

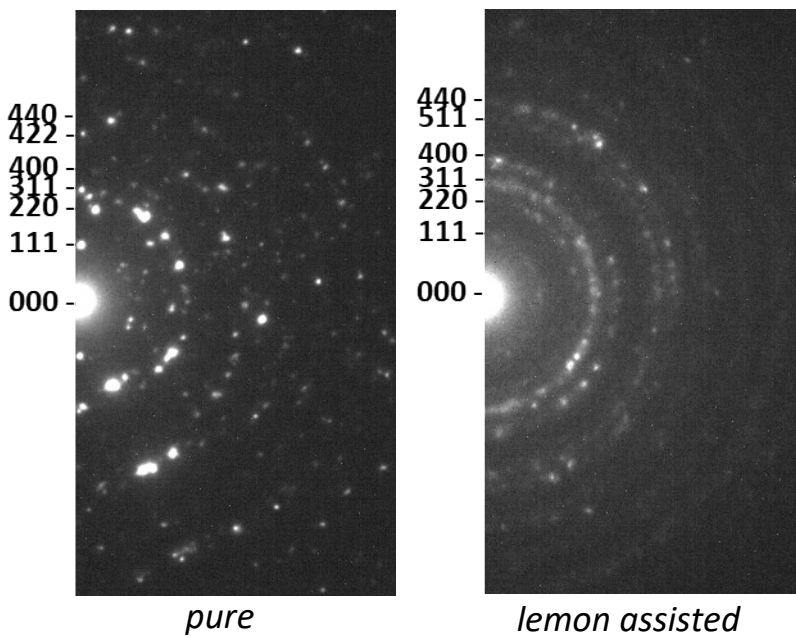

**Figure S2:** SAED patterns of pure  $\text{NiCo}_2\text{O}_4$  and lemon assisted  $\text{NiCo}_2\text{O}_4$  nanostructures

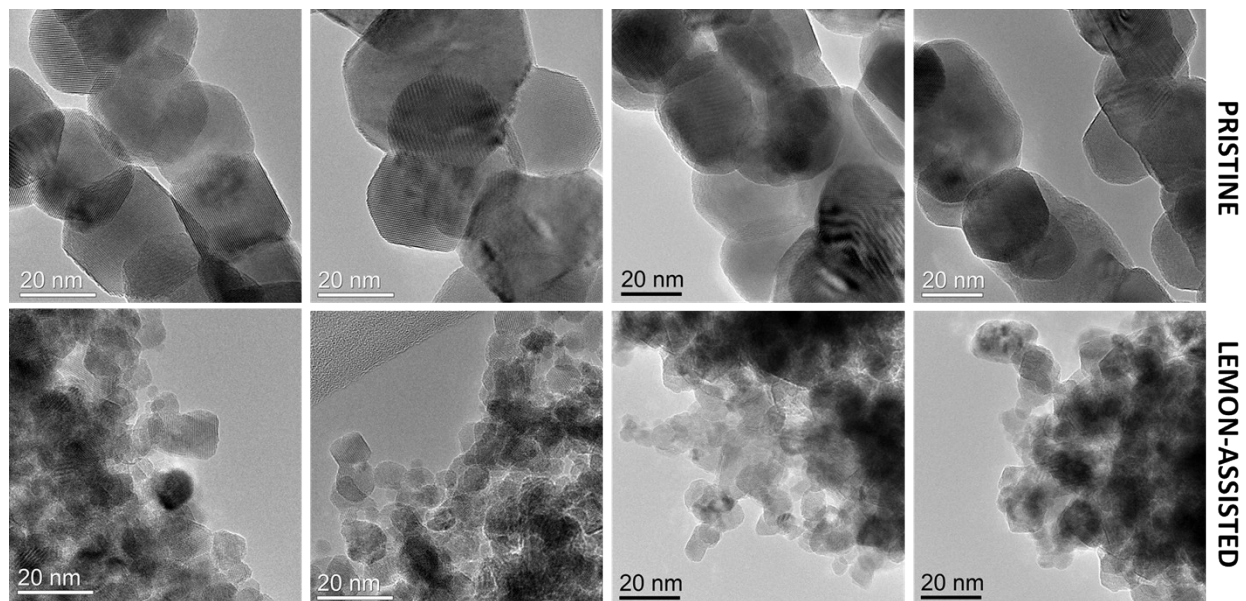

**Figure S3:** TEM micrographs of pure (top) and lemon-assisted (bottom)  $\text{NiCo}_2\text{O}_4$

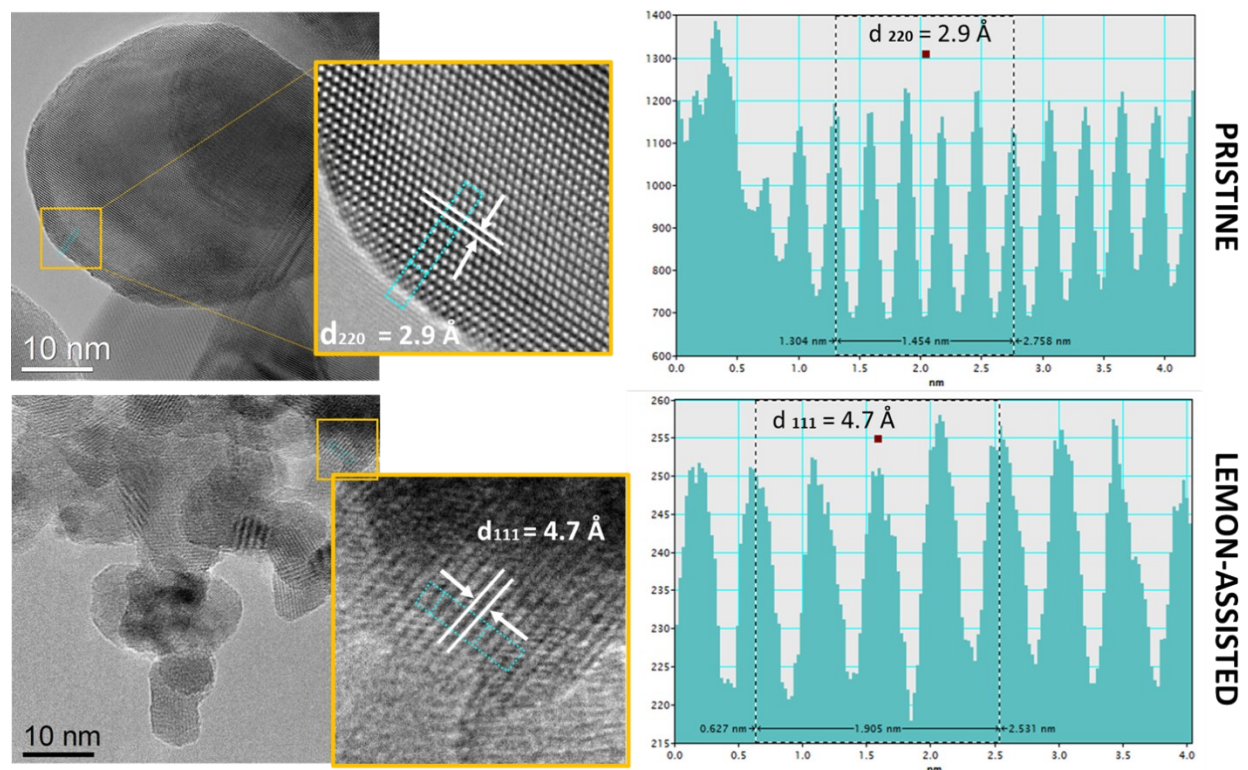

**Figure S4:** HRTEM micrographs of pure (top) and lemon-assisted (bottom)  $\text{NiCo}_2\text{O}_4$  with corresponding intensity profiles taken in blue squared area of HRTEM images

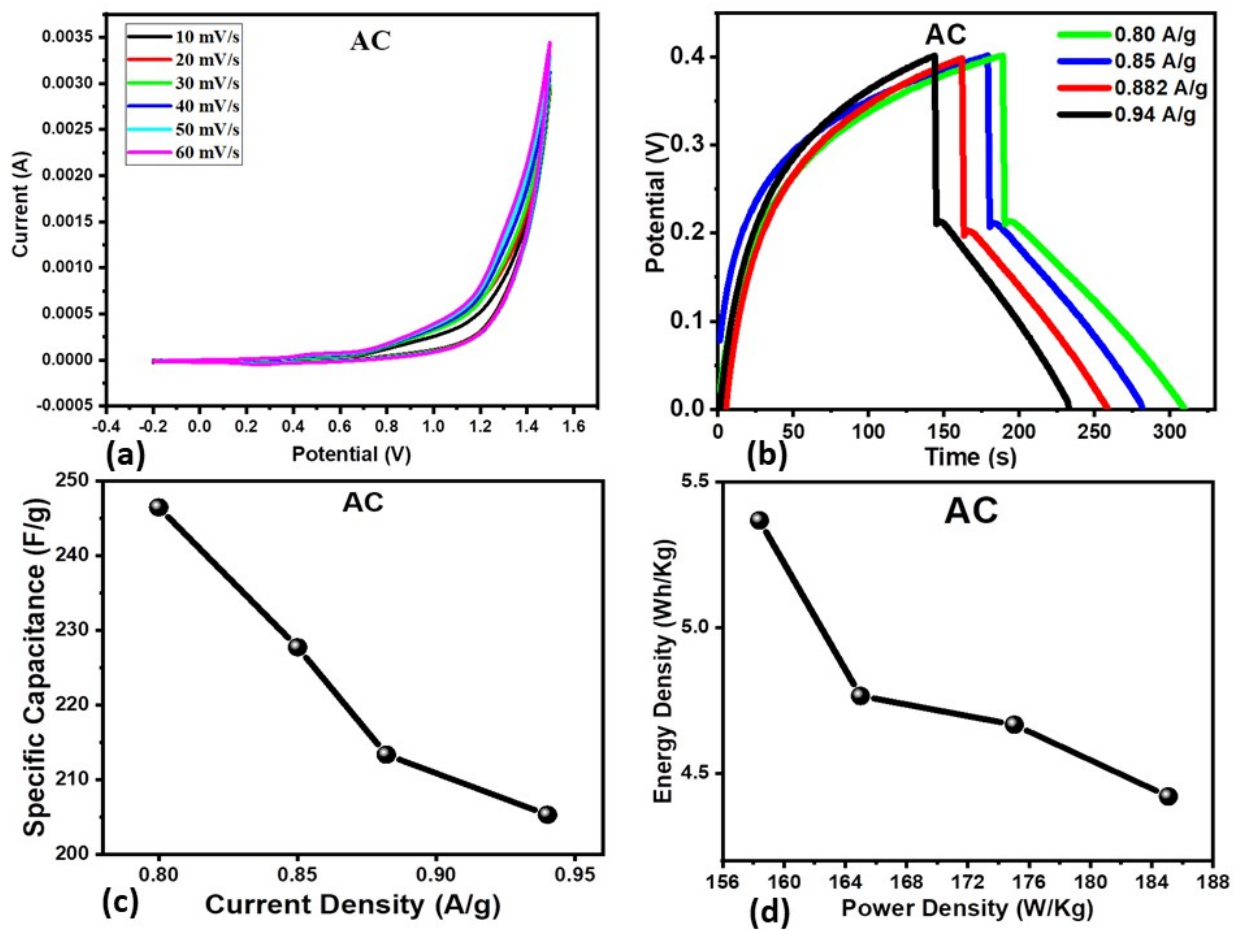

**Figure S5:** Various CV curves of activated carbon (AC) at various scan rates in 3.0M KOH, (b) GCD curves at different current density for AC, (c) specific capacitance of AC, (d) energy density and power density calculated values of AC

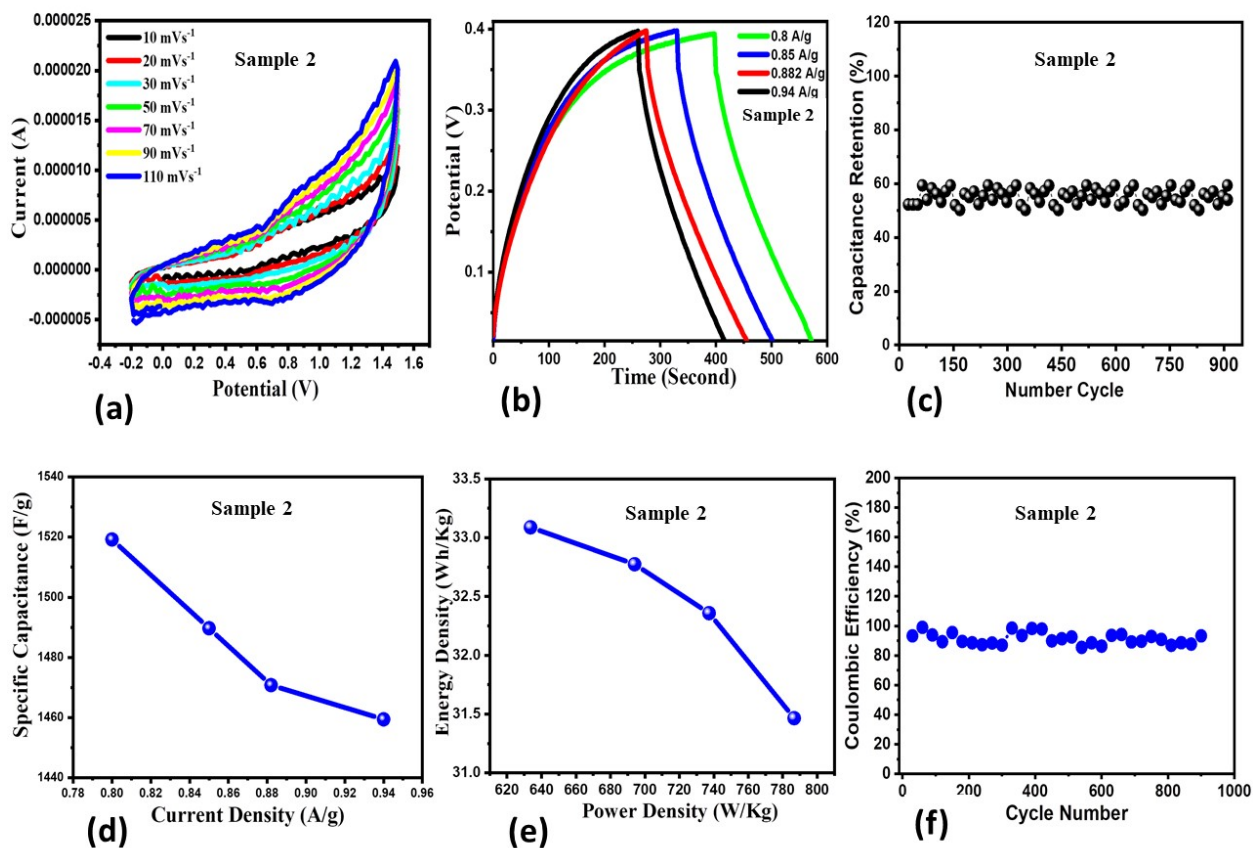

**Figure S6:** Various CV curves of NiCo<sub>2</sub>O<sub>4</sub> (sample 2) at different scan rates in 3.0M KOH, (b) GCD curves at different current density for NiCo<sub>2</sub>O<sub>4</sub> (sample 2), (c) Cycling stability of NiCo<sub>2</sub>O<sub>4</sub> (sample 2), (d) specific capacitance of NiCo<sub>2</sub>O<sub>4</sub> (sample 2) from GCD curves, (e) Energy density of NiCo<sub>2</sub>O<sub>4</sub> (sample 2), (f) Coulombic efficiency of NiCo<sub>2</sub>O<sub>4</sub> (sample 2) during cycling stability.



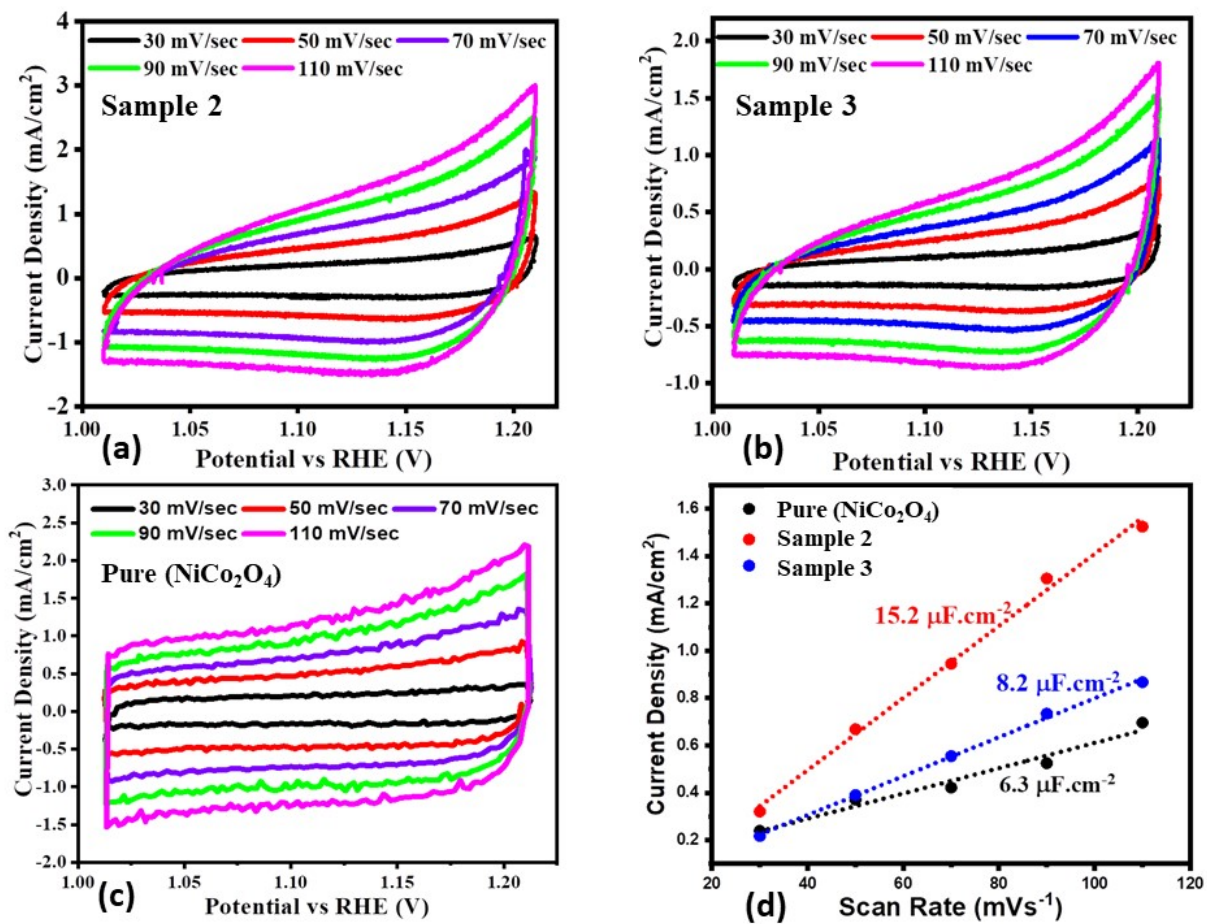

**Figure S7:** Different CV curves at various scan rates in 1.0M KOH for (a) pristine NiCo<sub>2</sub>O<sub>4</sub> nanostructure, (b) NiCo<sub>2</sub>O<sub>4</sub> (sample 2), (c) NiCo<sub>2</sub>O<sub>4</sub> (sample 3), (d) calculated ECSA from non-Faradic region of estimated CV curves for pristine NiCo<sub>2</sub>O<sub>4</sub> nanostructure, NiCo<sub>2</sub>O<sub>4</sub> (sample 2), NiCo<sub>2</sub>O<sub>4</sub> (sample 3).

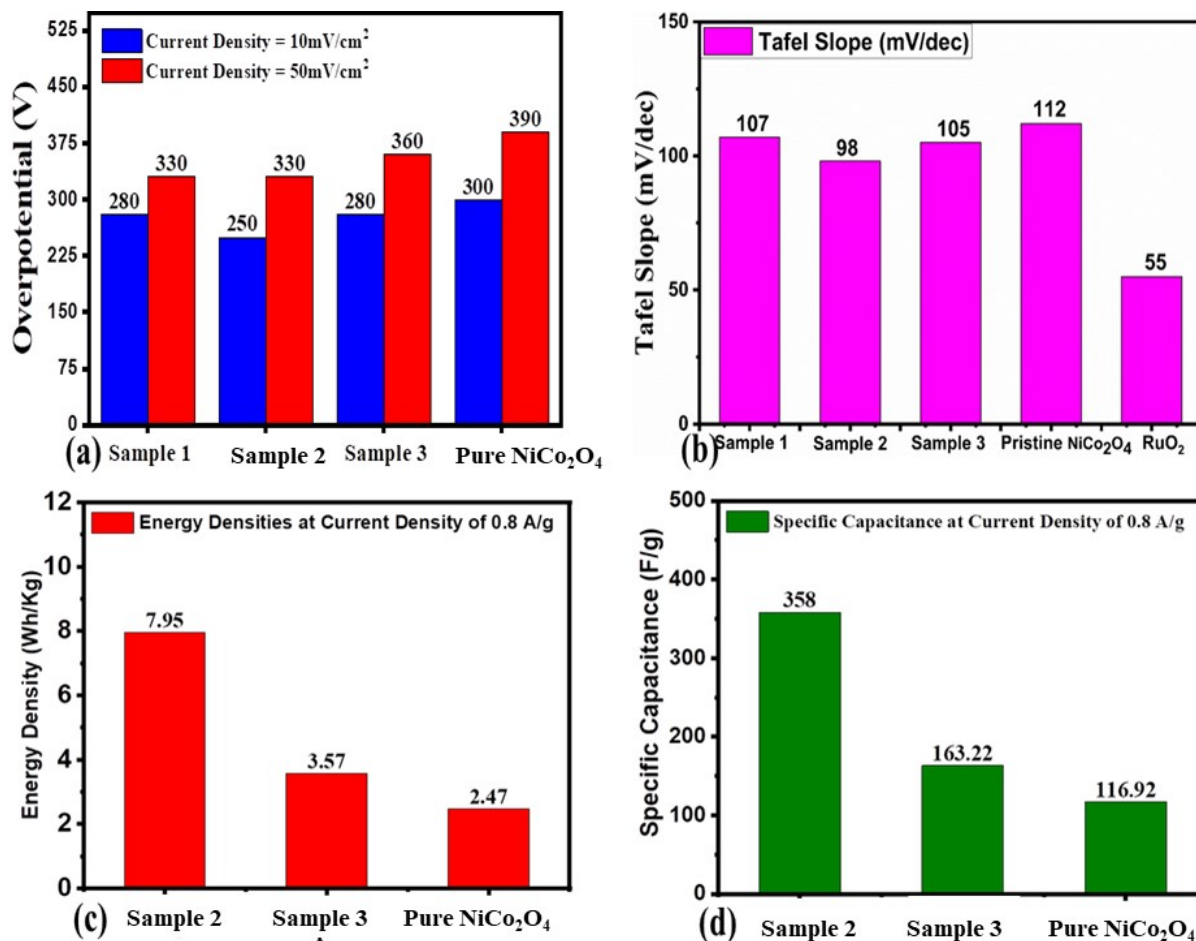

**Figure S8:** Bar graph view (a) overpotential at 10 and 50 mAcm<sup>-2</sup> for RuO<sub>2</sub>, pure NiCo<sub>2</sub>O<sub>4</sub> nanostructure, NiCo<sub>2</sub>O<sub>4</sub> (sample 2), NiCo<sub>2</sub>O<sub>4</sub> (sample 3), (b) Tafel slope for RuO<sub>2</sub>, pristine NiCo<sub>2</sub>O<sub>4</sub> nanostructure, NiCo<sub>2</sub>O<sub>4</sub> (sample 2), NiCo<sub>2</sub>O<sub>4</sub> (sample 3), (c) Energy density of supercapacitor for pristine NiCo<sub>2</sub>O<sub>4</sub> nanostructure, NiCo<sub>2</sub>O<sub>4</sub> (sample 2), NiCo<sub>2</sub>O<sub>4</sub> (sample 3), (d) specific capacitance (Cs) for pristine NiCo<sub>2</sub>O<sub>4</sub> nanostructure, NiCo<sub>2</sub>O<sub>4</sub> (sample 2) and (sample 2).

**Table S1:** Calculated average crystallite size of pure NiCo<sub>2</sub>O<sub>4</sub> and sample 1, sample 2 and sample 3.

| <b>Sample ID</b>                      | <b>Height</b> | <b>FWHM</b> | <b>Crystalline size (nm)</b> |
|---------------------------------------|---------------|-------------|------------------------------|
| Pure NiCo <sub>2</sub> O <sub>4</sub> | 44.61         | 0.26        | 14                           |
| Sample 1                              | 36.84         | 0.28        | 16                           |
| Sample 2                              | 45.03         | 0.25        | 14                           |
| Sample 3                              | 44.06         | 0.12        | 18                           |

**Table (S2):** Detailed XPS peak attributions for pure NiCo<sub>2</sub>O<sub>4</sub> and sample 2

| Pure (NiCo <sub>2</sub> O <sub>4</sub> ) |        |        |        |      |        |        |       |       |
|------------------------------------------|--------|--------|--------|------|--------|--------|-------|-------|
| Ni 2p3/2                                 |        |        |        |      |        |        |       |       |
| Band                                     | Pos    | PosSep | B_FWHM | FWHM | Height | %Gauss | Area  | %Area |
| 1                                        | 854.03 | 0      | 1.8    | 1.8  | 2730   | 90     | 5480  | 28.34 |
| 2                                        | 855.75 | 1.73   | 1.86   | 1.86 | 2442   | 100    | 4830  | 24.98 |
| 3                                        | 857.02 | 3      | 2.08   | 2.08 | 644    | 90     | 1492  | 7.72  |
| 4                                        | 861.11 | 7.08   | 4.68   | 4.68 | 1379   | 80     | 7532  | 38.96 |
| Co 2p3/2                                 |        |        |        |      |        |        |       |       |
| Band                                     | Pos    | PosSep | B_FWHM | FWHM | Height | %Gauss | Area  | %Area |
| 1                                        | 779.54 | 0      | 2.2    | 2.2  | 6105   | 80     | 15681 | 54.97 |
| 2                                        | 781.39 | 1.85   | 2.24   | 2.24 | 2627   | 80     | 6855  | 24.03 |
| 3                                        | 784.21 | 4.67   | 4.55   | 4.55 | 780    | 100    | 3781  | 13.25 |
| 4                                        | 788.93 | 9.39   | 4      | 4    | 495    | 90     | 2212  | 7.76  |
| O 1s                                     |        |        |        |      |        |        |       |       |
| Band                                     | Pos    | PosSep | B_FWHM | FWHM | Height | %Gauss | Area  | %Area |
| 1                                        | 529.43 | 0      | 1.11   | 1.11 | 9630   | 80     | 12480 | 61.02 |
| 2                                        | 531.13 | 1.7    | 1.54   | 1.54 | 3977   | 100    | 6509  | 31.82 |
| 3                                        | 532.69 | 3.26   | 1.6    | 1.6  | 820    | 90     | 1464  | 7.16  |
| Sample 2                                 |        |        |        |      |        |        |       |       |
| Ni 2p3/2                                 |        |        |        |      |        |        |       |       |
| Band                                     | Pos    | PosSep | B_FWHM | FWHM | Height | %Gauss | Area  | %Area |
| 1                                        | 853.95 | 0      | 1.8    | 1.8  | 2230   | 100    | 4273  | 29.14 |
| 2                                        | 855.67 | 1.73   | 1.8    | 1.8  | 1889   | 100    | 3619  | 24.69 |
| 3                                        | 856.9  | 2.95   | 1.7    | 1.7  | 521    | 100    | 944   | 6.44  |
| 4                                        | 860.85 | 6.9    | 5.5    | 5.5  | 978    | 96     | 5825  | 39.73 |
| Co 2p3/2                                 |        |        |        |      |        |        |       |       |
| Band                                     | Pos    | PosSep | B_FWHM | FWHM | Height | %Gauss | Area  | %Area |
| 1                                        | 779.29 | 0      | 2.02   | 2.02 | 3274   | 100    | 7045  | 53.88 |
| 2                                        | 781.09 | 1.8    | 2.3    | 2.3  | 1722   | 80     | 4617  | 35.31 |
| 3                                        | 784.07 | 4.79   | 4.5    | 4.5  | 192    | 100    | 918   | 7.02  |
| 4                                        | 788.81 | 9.52   | 4.58   | 4.58 | 101    | 100    | 494   | 3.78  |
| O 1s                                     |        |        |        |      |        |        |       |       |
| Band                                     | Pos    | PosSep | B_FWHM | FWHM | Height | %Gauss | Area  | %Area |
| 1                                        | 529.25 | 0      | 1.2    | 1.2  | 6083   | 90     | 8139  | 47.59 |
| 2                                        | 531.08 | 1.83   | 1.82   | 1.82 | 3078   | 90     | 6234  | 36.45 |
| 3                                        | 532.53 | 3.27   | 1.5    | 1.5  | 1562   | 80     | 2731  | 15.96 |

**Table S3:** The calculated various supercapacitor indicators pure NiCo<sub>2</sub>O<sub>4</sub> nanostructure (sample 2), NiCo<sub>2</sub>O<sub>4</sub> (sample 3)

| <b>Samples</b>                           | <b>Current Density (Ag<sup>-1</sup>)</b> | <b>Specific Capacitance (Fg<sup>-1</sup>)</b> | <b>Energy Density (Wh kg<sup>-1</sup>)</b> | <b>Power Density (W kg<sup>-1</sup>)</b> | <b>Columbic Efficiency (%)</b> | <b>Capacitance Retention (%)</b> |
|------------------------------------------|------------------------------------------|-----------------------------------------------|--------------------------------------------|------------------------------------------|--------------------------------|----------------------------------|
| Sample 2                                 | 0.8                                      | 358                                           | 8                                          | 160                                      | 70%                            | 100-94%                          |
|                                          | 0.85                                     | 284                                           | 6                                          | 167                                      |                                |                                  |
|                                          | 0.882                                    | 126                                           | 3                                          | 176                                      |                                |                                  |
|                                          | 0.94                                     | 118                                           | 3                                          | 188                                      |                                |                                  |
| Sample 3                                 | 0.8                                      | 163                                           | 4                                          | 159                                      | 64%                            | 108-83%                          |
|                                          | 0.85                                     | 154                                           | 3                                          | 169                                      |                                |                                  |
|                                          | 0.882                                    | 149                                           | 3                                          | 175                                      |                                |                                  |
|                                          | 0.94                                     | 60                                            | 1                                          | 183                                      |                                |                                  |
| Pure (NiCo <sub>2</sub> O <sub>4</sub> ) | 0.8                                      | 117                                           | 2                                          | 156                                      | 43%                            | 90-61%                           |
|                                          | 0.85                                     | 113                                           | 2                                          | 166                                      |                                |                                  |
|                                          | 0.882                                    | 112                                           | 2                                          | 171                                      |                                |                                  |
|                                          | 0.94                                     | 109                                           | 2                                          | 183                                      |                                |                                  |

**Table S4:** Supercapacitor performance evaluation of as synthesized NiCo<sub>2</sub>O<sub>4</sub> nanostructure with lemon juice (sample 2) with reported supercapacitor based on NiCo<sub>2</sub>O<sub>4</sub>

| Material                                           | Specific Capacitance (Fg <sup>-1</sup> ) | Current Density (Fg <sup>-1</sup> ) | Potential Window  | Energy Density (Wh kg <sup>-1</sup> ) | Power Density (W kg <sup>-1</sup> ) | Reference        |
|----------------------------------------------------|------------------------------------------|-------------------------------------|-------------------|---------------------------------------|-------------------------------------|------------------|
| NCO@MWCNT                                          | 374 F/g                                  | 2 A/g                               | -0.5 to 2.2V      | 95                                    | 3964                                | 4                |
| MWCNTs                                             | 84 F/g                                   | 0.6 A/g                             | -0.5 to 2.2V      | 21                                    | 6237                                | 4                |
| NCO//MWCNT                                         | 157 F/g                                  | 0.6 A/g                             | -0.5 to 2.2V      | 40                                    | 2816                                | 4                |
| NCO@MWCNT//MWCNT                                   | 242 F/g                                  | 0.6 A/g                             | -0.5 to 2.2V      | 61                                    | 2837                                | 4                |
| NiCoF                                              | 50.0                                     | 1 A/g                               | 0 to 1 V          | -                                     | -                                   | 5                |
| NiCuF                                              | 44                                       | 1 A/g                               | 0 to 1 V          | -                                     | -                                   | 5                |
| NC6                                                | 1294.25                                  | 10 A/g                              | 0.4               | -                                     | -                                   | 6                |
| NC10                                               | 687.20                                   | 10 A/g                              | 0.4               | -                                     | -                                   | 6                |
| Ni-Co-O-1                                          | 568                                      | 20 A g                              | 0 to 0.5 V        | 19.72                                 | 5000                                | 7                |
| Ni-Co-O-2                                          | 532                                      | 20 Ag                               | -                 | -                                     | -                                   | 7                |
| <b>NiCo<sub>2</sub>O<sub>4</sub> (Lemon juice)</b> | <b>358</b>                               | <b>0.8 A/g</b>                      | <b>0 to 0.4 V</b> | <b>7.96</b>                           | <b>160</b>                          | <b>This Work</b> |

**Table S5:** Measured indicators for asymmetric supercapacitor using two electrode configuration of NiCo<sub>2</sub>O<sub>4</sub> (sample 2) for practical applications

| Samples  | Current Density (Ag <sup>-1</sup> ) | Specific capacitance (Fg <sup>-1</sup> ) | Energy density (Wh kg <sup>-1</sup> ) | Power Density (W kg <sup>-1</sup> ) | Columbic Efficiency (%) | Capacitance Retention (%) |
|----------|-------------------------------------|------------------------------------------|---------------------------------------|-------------------------------------|-------------------------|---------------------------|
| Sample 2 | 0.8                                 | 1519                                     | 33                                    | 634                                 | 100-84%                 | 64-52%<br>( 900 Cycles)   |
|          | 0.85                                | 1490                                     | 33                                    | 694                                 |                         |                           |
|          | 0.882                               | 1471                                     | 32                                    | 737                                 |                         |                           |
|          | 0.94                                | 1459                                     | 31                                    | 787                                 |                         |                           |

**Table S6:** Fitting values of EIS for charge transfer and double layer capacitance for pristine NiCo<sub>2</sub>O<sub>4</sub> nanostructure, NiCo<sub>2</sub>O<sub>4</sub> (sample 2), NiCo<sub>2</sub>O<sub>4</sub> (sample 3)

| Samples                                   | Charge Transform Resistance (Rct in Ω) | Double Layer Capacitor (Cdl in Farad) |
|-------------------------------------------|----------------------------------------|---------------------------------------|
| Pristine NiCo <sub>2</sub> O <sub>4</sub> | 968                                    | 0.32                                  |
| Sample 2                                  | 165                                    | 2.28                                  |
| Sample 3                                  | 547                                    | 0.74                                  |

**Table S7:** The summary of OER activity performance of lemon juice assisted NiCo<sub>2</sub>O<sub>4</sub> nanostructures with recently reported electrocatalysts in 1.0 M KOH.

| Catalyst                                                                           | Over potential<br>(mV) @ 10<br>mA/cm <sup>2</sup> | Electrolyte      | References              |
|------------------------------------------------------------------------------------|---------------------------------------------------|------------------|-------------------------|
| NiCo <sub>2</sub> O <sub>4</sub> @Graphene Nano sheets                             | 383                                               | 1.0 M KOH        | 8                       |
| NiO <sub>x</sub> /NiCo <sub>2</sub> O <sub>4</sub> /Co <sub>3</sub> O <sub>4</sub> | 315                                               | 1.0 M KOH        | 9                       |
| NiCo <sub>2</sub> O <sub>4</sub> /CoO/graphite                                     | 323                                               | 1.0 M KOH        | 10                      |
| MOF derived-NiCo <sub>2</sub> O <sub>4</sub> /NiO                                  | 430                                               | 1.0 M KOH        | 11                      |
| P-doped NiCo <sub>2</sub> O <sub>4</sub> on Ni-Foam                                | 300                                               | 1.0 M KOH        | 12                      |
| Co <sub>8</sub> FeS <sub>8</sub> /CoS@CNT                                          | 278                                               | 1.0 M KOH        | 13                      |
| CoS <sub>x</sub> /MoS <sub>2</sub>                                                 | 347                                               | 1.0 M KOH        | 14                      |
| NiCo <sub>2</sub> O <sub>4</sub> /NiO                                              | 360                                               | 1.0 M KOH        | 15                      |
| Co <sub>x</sub> Ni <sub>1-x</sub> S <sub>2</sub> (CNS)/RGO                         | 290                                               | 1.0 M KOH        | 16                      |
| 3D core-shell NiCo <sub>2</sub> O <sub>4</sub> @CoS/NF                             | 290                                               | 1.0 M KOH        | 17                      |
| CoFe/Co <sub>8</sub> FeS <sub>8</sub> /CNT                                         | 290                                               | 1.0 M KOH        | 18                      |
| NiCo <sub>2</sub> O <sub>4</sub> /NiO hexagonal rods                               | 285                                               | 1.0 M KOH        | 19                      |
| Ni <sub>3</sub> S <sub>2</sub> /MoS <sub>2</sub> (NiMoS)                           | 260                                               | 1.0 M KOH        | 20                      |
| Ni <sub>3</sub> N-NiMoN                                                            | 277                                               | 1.0 M KOH        | 21                      |
| Co <sub>3</sub> O <sub>4</sub> @CMC                                                | 290                                               | 1.0 M KOH        | 22                      |
| <b>Lemon juice assisted NiCo<sub>2</sub>O<sub>4</sub><br/>material</b>             | <b>250</b>                                        | <b>1.0 M KOH</b> | <b>Present<br/>Work</b> |



## References

- [1] E. Jokar & A. zad & S. Shahrokhian, *J Solid State Electrochem* 2015, 19, 269–274.
- [2] Y. Liu, Y. Zheng, Q. Xu, Y. Shi, Z. Tian, R. wang, G. Zhang, J. Chen, Z. Wang, W. Zheng, *Chem. Eng. J.* 2020, 387, 12412-21.
- [3] C.Young, R. R. Salunkhe, S. M. Alshehri,T. Ahamad, Z. Huang, J. Henzie, and Y. Yamauchi, *J. Mater. Chem. A*, 2017, 5, 11834-11839.
- [4] M. Pathak, J. R. Jose, B. Chakraborty, and C. S. Rout, *The Journal of Chemical Physics*, 2020, 152, 064706.
- [5] B. Bhujun, M. T. Tan, and A. S. Shanmugam, *Results in Physics*, 2017, 7, 345-353.
- [6] M. Kaur, P. Chand, and H. Anand, *Journal of Energy Storage*, 2022, 52, 104941.
- [7] H. Wang, Q. Gao, and L. Jiang, *small*, 2011, 7, 2454-2459.
- [8] Z. Li, B. Li, J. Chen, Q. Pang, P. Shen. *Int. J. Hydrogen Energy.*, 2019, 44, 16120–16131.
- [9] J. Chen, Y. Ling, Z. Lu, X. Huai, F. Qin, Z. Zhang. *Electrochim. Acta.* 2019, 322, 134753.
- [10] N. Srinivasa, L. Shreenivasa, P.S. Adarakatti, J.P. Hughes, S.J. Rowley-Neale, C.E. Banks, S. Ashoka, *RSC Adv.* 2019, 9, 24995–25002.
- [11] Y. Wang, Z. Zhang, X. Liu, F. Ding, P. Zou, X. Wang, Q. Zhao, H. Rao. *ACS Sustainable Chem. Eng.* 2018, 6, 12511–12521.
- [12] W. Chu, Z. Shi, Y. Hou, D. Ma, X. Bai, Y. Gao, N. Yang. *ACS Appl. Mater. Interfaces*, 2020, 12, 2763–2772.
- [13] B. Wang, Y. Chen, X. Wang, X. Zhang, Y. Hu, B. Yu, D. Yang, W. Zhang. *J. Power Sources.* 2020, 449, 227561.
- [14] L. Yang, L. Zhang, G. Xu, X. Ma, W. Wang, H. Song, D. Jia. *ACS Sustainable Chem. Eng.* 2018, 6, 12961–12968.
- [15] C. Mahala, M. Basu. *ACS Omega* 2017, 2, 7559–7567.
- [16] Y.-R. Hong, S. Mhin, K.-M. Kim, W.-S. Han, H. Choi, G. Ali, K.Y. Chung, H.J. Lee, S.-I. Moon, S. Dutta, S. Sun, Y.-G. Jung, T. Song, H. Han. *J. Mater. Chem. A* 2019, 7, 3592–3602.
- [17] S. Adhikari, Y. Kwon, and D. H. Kim. *Chemical Engineering Journal*, 2020, 402, 126192.

- [18] B. Wang, Y. Hu, B. Yu, X. Zhang, D. Yang, Y. Chen. *J. Power Sources.*, 2019, 433, 126688.
- [19] Y. Yuan, L. Sun, Y. Li, W. Zhan, X. Wang, X. Han, *Inorg. Chem.* 2020, 59, 4080–4089.
- [20] C. Wang, X. Shao, J. Pan, J. Hu, X. Xu. *Appl. Catal. B.*, 2020, 268, 118435.
- [21] A. Wu, Y. Xie, H. Ma, C. Tian, Y. Gu, H. Yan, X. Zhang, G. Yang, and H. Fu. *Nano Energy*, 2018, 44, 353-363.
- [22] A. L. Bhatti, A. Tahira, A. Gradone, R. Mazzaro, V. Morandi, M.I. Abro, A. Nafady, K. Qi. *Electrochimica Acta*, 2021, 398, 139338.
